# Supplementary material for: A three-dimensionally preserved lobopodian from the Herefordshire (Silurian) Lagerstätte, UK
Source: R Soc Open Sci. 2018 Aug 8;5(8):172101. doi: 10.1098/rsos.172101 (PMC6124121; doi:10.1098/rsos.172101)
Supplement: ESM Table S2 [file rsos172101supp4.xlsx]

## Sheet: Matrix
CONTINUOUS	0	1	2	3	4	5	6	7	8	9	10	MERISTIC	11	12	13	14	15	16	17	18	19	20	21	22	23	24	25	26	27	28	29	DISCRETE	30	31	32	33	34	35	36	37	38	39	40	41	42	43	44	45	46
& [Continuous]												& [Continuous]																				& [Numeric]
Caenorhabditis_elegans	?	?	?	?	?	?	?	?	?	?	?	Caenorhabditis_elegans	?	?	?	?	?	?	?	?	?	?	?	?	?	?	?	?	?	?	?	Caenorhabditis_elegans	0	0	-	0	-	0	-	-	-	-	-	-	-	-	0	0	-
Priapulus_caudatus	?	?	?	?	?	?	?	?	?	?	?	Priapulus_caudatus	?	?	?	?	?	?	?	?	?	?	?	?	?	?	?	?	?	?	?	Priapulus_caudatus	0	0	0	0	-	0	-	-	-	-	-	-	-	-	0	0	-
UB_W266	?	?	?	?	?	?	?	?	?	?	?	UB_W266	?	?	?	?	?	4	?	?	?	?	2	?	?	?	?	?	?	?	?	UB_W266	1	1	?	0	-	1	1	0	0	0	-	-	-	-	0	0	-
Stygarctus_bradypus	?	?	?	?	?	?	?	?	?	?	?	Stygarctus_bradypus	1	?	?	?	1	4	?	?	?	?	4	?	?	?	?	?	?	?	?	Stygarctus_bradypus	1	1	0	1	0	1	1	1	1	1	0	0	0	0	0	0	-
Actinarctus_doryphorus	?	?	?	?	?	?	?	?	?	?	?	Actinarctus_doryphorus	?	?	?	?	1	4	?	?	?	?	4	?	?	?	?	?	?	?	1	Actinarctus_doryphorus	1	1	0	0	-	1	1	1	1	0	-	-	-	-	0	0	-
Echiniscoides_sigismundi	?	?	?	?	?	?	?	?	?	?	?	Echiniscoides_sigismundi	?	1	?	?	1	4	?	?	?	?	8	?	?	?	?	?	?	?	?	Echiniscoides_sigismundi	1	0	0	0	-	1	1	0	1	0	-	-	-	-	0	1	0
Echiniscus_testudo	?	?	?	?	?	?	?	?	?	?	?	Echiniscus_testudo	1	?	?	?	1	4	?	?	?	?	4	?	?	?	?	?	?	?	1	Echiniscus_testudo	1	1	0	1	0	1	1	0	1	1	0	0	0	0	0	0	-
Milnesium_tardigradum	?	?	?	?	?	?	?	?	?	?	?	Milnesium_tardigradum	?	1	?	?	1	4	?	?	?	?	4	?	?	?	?	?	?	?	1	Milnesium_tardigradum	1	0	0	0	-	1	1	1	0	0	-	-	-	-	0	1	0
Hypsibius_dujardini	?	?	?	?	?	?	?	?	?	?	?	Hypsibius_dujardini	?	1	?	?	1	4	?	?	?	?	2	?	?	?	?	?	?	?	1	Hypsibius_dujardini	1	0	0	0	-	1	0	1	0	0	-	-	-	-	0	1	0
Macrobiotus_hufelandii	?	?	?	?	?	?	?	?	?	?	?	Macrobiotus_hufelandii	?	1	?	?	1	4	?	?	?	?	2	?	?	?	?	?	?	?	1	Macrobiotus_hufelandii	1	0	0	0	-	1	0	1	0	0	-	-	-	-	0	1	0
Cretoperipatus_burmiticus	?	?	?	?	2.32	?	?	1.59	?	0.6	?	Cretoperipatus_burmiticus	?	1	?	?	3	22	?	?	?	?	2	?	?	?	?	?	?	?	?	Cretoperipatus_burmiticus	1	?	?	0	-	1	0	0	0	0	-	-	-	-	0	1	0
Epiperipatus_edwardsii	?	?	?	?	?	?	?	?	?	?	?	Epiperipatus_edwardsii	?	1	?	?	3	32	?	?	?	?	2	?	?	?	?	?	?	?	?	Epiperipatus_edwardsii	1	?	?	0	-	1	0	0	0	0	-	-	-	-	0	1	0
Euperipatoides_kanangrensis	?	?	?	2.4	2.65	?	?	1.45-1.66	?	0.41-0.63	?	Euperipatoides_kanangrensis	?	1	?	?	3	14	?	?	?	?	2	?	?	?	?	?	?	?	2	Euperipatoides_kanangrensis	1	?	1	0	-	1	0	0	0	0	-	-	-	-	0	1	0
Euperipatoides_rowelli	?	?	?	0.93	2.59	?	?	1.59-1.60	?	0.40-0.69	?	Euperipatoides_rowelli	?	1	?	?	3	14	?	?	?	?	2	?	?	?	?	?	?	?	2	Euperipatoides_rowelli	1	?	?	0	-	1	0	0	0	0	-	-	-	-	0	1	0
Peripatus_juliformis	?	?	?	1.28	2.49	?	?	1.29-1.30	?	0.27-0.31	?	Peripatus_juliformis	?	1	?	?	3	29-34	?	?	?	?	2	?	?	?	?	?	?	?	?	Peripatus_juliformis	1	?	?	0	-	1	0	0	0	0	-	-	-	-	0	1	0
Diania_cactiformis	?	?	?	1.06	?	?	?	3.81-5.08	?	3.39-4.63	?	Diania_cactiformis	?	?	1	?	?	10	?	?	?	?	?	?	?	?	?	?	?	?	?	Diania_cactiformis	1	?	-	0	-	0	?	?	?	0	-	-	-	-	0	0	-
Paucipodia_inermis	?	?	?	1.23-1.42	?	?	?	3.61-5.27	?	1.34-3.12	?	Paucipodia_inermis	?	?	?	?	?	9	?	?	?	?	1-2	?	?	?	?	?	?	?	?	Paucipodia_inermis	1	?	?	0	-	0	0	0	0	0	-	-	-	-	0	0	-
Microdictyon_sinicum	?	?	?	0.46-0.80	?	?	?	3.97-4.78	?	1.25-2.71	?	Microdictyon_sinicum	?	?	2	?	?	10	?	?	?	?	1-2	?	?	?	?	?	?	?	?	Microdictyon_sinicum	1	?	0	0	-	0	?	?	?	0	-	-	-	-	0	0	-
Cardiodictyon_catenulum	?	?	?	?	?	?	?	6.38-11.31	0.83-1.35	1.75	0.62	Cardiodictyon_catenulum	?	2	2	?	?	27	2	?	?	25	2	?	?	?	?	?	?	?	?	Cardiodictyon_catenulum	1	?	0	0	-	1	0	0	0	0	-	-	-	-	0	1	1
Hallucigenia_sparsa	?	2.45-4.28	6.17-6.49	?	?	?	?	4.86-13.89	2.17	2.21-2.80	0.96	Hallucigenia_sparsa	?	1	2	?	?	10	3	?	?	7	1-2	?	?	?	?	?	?	?	?	Hallucigenia_sparsa	1	?	1	0	-	1	0	0	0	0	-	-	-	-	0	1	0
Hallucigenia_fortis	?	1.94-2.90	2.71-4.66	0.55	?	?	?	5.57-12.04	2.98-3.77	2.01	?	Hallucigenia_fortis	?	2	2	?	?	10	3	?	?	8	?	?	?	?	?	?	?	?	?	Hallucigenia_fortis	1	?	?	0	-	1	0	0	0	0	-	-	-	-	0	1	1
Hallucigenia_hongmeia	?	1.17-1.69	1.74-2.88	?	?	?	?	?	?	?	?	Hallucigenia_hongmeia	?	?	2	?	?	?	?	?	?	7	?	?	?	?	?	?	?	?	?	Hallucigenia_hongmeia	1	?	?	0	-	?	?	?	?	?	?	?	?	?	?	?	?
Antennacanthopodia_gracilis	?	?	?	0.96	?	?	?	0.93-1.76	?	0.52-0.71	?	Antennacanthopodia_gracilis	?	?	?	?	2	9	?	?	?	?	?	?	?	?	?	?	?	?	?	Antennacanthopodia_gracilis	1	?	-	0	-	1	0	0	0	0	-	-	-	-	0	?	?
Aysheaia_pedunculata	?	?	?	?	0.76-0.95	?	?	1.82-3.03	?	0.60-0.89	?	Aysheaia_pedunculata	?	1	?	?	1	10	?	1	?	?	4	1	?	?	?	?	?	?	?	Aysheaia_pedunculata	1	?	0	0	-	1	0	0	0	0	-	-	-	-	0	1	0
Onychodictyon_ferox	?	0.51	1.77-1.81	?	1.62	?	?	3.85-5.30	?	1.10-1.42	?	Onychodictyon_ferox	?	1	2	?	1	11	?	1	?	?	2	2	?	?	?	?	?	?	?	Onychodictyon_ferox	1	?	0	0	-	1	0	0	0	0	-	-	-	-	0	1	0
Onychodictyon_gracilis	?	0.67-0.71	2.17-2.34	?	?	?	?	?	?	?	?	Onychodictyon_gracilis	?	?	2	?	?	12	?	1	?	?	2	?	?	?	?	?	?	?	?	Onychodictyon_gracilis	1	?	?	0	-	?	?	?	?	0	-	-	-	-	0	0	-
ROM_52703	?	0.62-0.75	2.68-3.23	3.93	?	?	?	0.95-9.77	1.32-1.53	0.31-0.41	3.75	ROM_52703	2	?	5	?	?	12	6	2	?	6	1	?	?	?	?	?	?	?	?	ROM_52703	1	?	?	0	-	1	?	0	0	1	2	0	-	0	0	1	?
ROM_53234	?	0.33-0.54	1.71-2.95	?	1.33	?	?	4.46-5.75	1.17-1.20	?	?	ROM_53234	2	?	5	?	1	9	6	2	3	3	1	?	?	?	?	?	?	?	?	ROM_53234	1	?	?	0	-	1	0	0	0	1	2	0	-	0	0	0	-
Ovatiovermis_cribratus	?	?	?	?	?	?	?	1.96-7.26	1.48-2.19	0.50-1.23	1.91	Ovatiovermis_cribratus	?	1	?	?	?	9	6	2	2	3	1	?	?	?	?	?	?	?	?	Ovatiovermis_cribratus	1	?	?	0	-	1	0	0	0	0	-	-	-	-	0	1	0
SAM_P14848	?	0.41-0.71	3.16-4.01	?	?	?	?	?	?	?	?	SAM_P14848	1	?	3	?	?	?	5	2	?	?	1	?	?	?	?	?	?	?	?	SAM_P14848	1	?	?	0	-	1	?	?	0	1	2	?	0	0	?	?	?
Collinsium_cilliosum	?	0.49-2.12	4.46-5.66	?	?	?	?	1.92-6.70	1.15-1.28	0.81-0.91	?	Collinsium_cilliosum	2	?	3	?	1	15	6	2	?	9	1	?	?	?	?	?	?	?	?	Collinsium_cilliosum	1	?	?	0	-	1	0	0	0	1	2	-	-	-	0	0	-
Acinocrinus_stichus	?	0.78-1.45	3.37-5.58	?	?	?	?	?	?	?	?	Acinocrinus_stichus	?	?	7	?	?	?	?	2	?	?	?	?	?	?	?	?	?	?	?	Acinocrinus_stichus	1	?	?	0	-	?	?	?	?	?	?	?	?	?	?	?	?
Luolishania_longicruris	?	0.97-2.01	3.95-5.39	3.68	1.85	?	?	2.78-9.17	2.33-3.57	1.14-1.52	2.28	Luolishania_longicruris	3	3	3	?	1	14	5	2	4	9	1	?	?	?	?	?	?	?	?	Luolishania_longicruris	1	?	?	0	-	1	0	0	0	1	2	0	0	0	0	1	1
Siberion_lenaicus	?	?	?	2.46	1.81	?	?	2.1	?	0.69-0.78	?	Siberion_lenaicus	?	?	?	?	1	13	?	?	?	?	?	?	?	?	?	?	?	?	?	Siberion_lenaicus	1	?	?	0	-	1	?	0	0	?	?	?	?	?	?	?	?
Xenusion_auerswaldae	?	?	?	?	?	?	?	3.37-4.99	?	0.87-1.11	?	Xenusion_auerswaldae	?	?	2	?	?	?	?	1	?	?	?	?	?	?	?	?	?	?	?	Xenusion_auerswaldae	1	?	-	0	-	?	?	?	?	?	?	?	?	?	?	?	?
Hadranax_augustus	?	?	?	?	?	?	?	2.35-3.59	?	1.03-1.17	?	Hadranax_augustus	?	?	4	?	?	?	?	?	?	?	?	?	?	?	?	?	?	?	?	Hadranax_augustus	1	?	-	0	-	?	?	?	?	?	?	?	?	?	?	?	?
Megadictyon_haikouensis	?	?	?	1.48	2.6	?	?	2.10-3.22	?	0.70-1.01	?	Megadictyon_haikouensis	?	?	?	?	1	?	?	?	?	?	?	1	?	?	?	?	1	?	?	Megadictyon_haikouensis	1	?	-	0	-	1	?	0	0	?	?	?	?	?	?	?	?
Thanahita_distos	?	?	?	0.27	?	?	?	6.11-7.03	1.11	1.35-2.22	0.58	Thanahita_distos	?	?	?	?	?	?	?	?	?	7	1-2	?	?	?	?	?	?	?	?	Thanahita_distos	1	?	?	0	-	?	?	?	?	?	?	?	?	?	?	?	?
Pambdelurion_whittingtoni	?	?	?	?	?	?	?	2.90-4.88	?	1.29-2.08	?	Pambdelurion_whittingtoni	?	?	?	?	1	12	?	?	?	?	?	1	?	?	?	1	1	?	?	Pambdelurion_whittingtoni	1	?	-	0	-	1	0	0	0	?	?	?	?	?	?	?	?
Kerygmachela_kieregaardi	?	?	?	?	2.63	?	0.82	1.44-2.20	?	0.51-0.52	?	Kerygmachela_kieregaardi	?	1	2	?	1	12	?	?	?	?	?	1	?	?	?	1	1	?	?	Kerygmachela_kieregaardi	1	?	-	0	-	1	0	0	0	0	-	-	-	-	0	1	1
Opabinia_regalis	?	?	?	?	?	?	2.28	?	?	?	?	Opabinia_regalis	?	2	?	?	1	18	?	?	?	?	?	?	?	?	?	1	3	?	?	Opabinia_regalis	1	?	-	1	0	1	0	0	0	0	-	-	-	-	1	1	1
Aegirocassis_benmoulae	2.03-2.48	?	?	?	?	6.58	?	0.97-1.04	?	0.31-0.34	?	Aegirocassis_benmoulae	1	?	?	?	1	?	?	?	?	?	?	1	?	?	?	1	?	?	?	Aegirocassis_benmoulae	1	?	-	1	0	1	-	-	-	1	0	1	1	1	?	?	?
Anomalocaris_canadensis	0.77-0.84	?	?	?	3.17-3.48	0.48-0.53	2.87	?	?	?	?	Anomalocaris_canadensis	1	1	?	?	1	19	?	?	?	?	?	2	14	?	?	1	3	?	?	Anomalocaris_canadensis	1	?	-	0	-	1	0	0	0	1	0	0	0	1	0	1	1
Hurdia_victoria	1.95	?	?	?	?	1.22-2.14	?	?	?	?	?	Hurdia_victoria	1	1	?	?	1	8-10	?	?	?	?	?	1	9-11	?	?	1	1	?	?	Hurdia_victoria	1	?	-	1	0	1	-	-	-	1	0	1	1	1	0	1	1
Lyrarapax_unguispinus	0.53	?	?	?	?	0.4-0.72	?	?	?	?	?	Lyrarapax_unguispinus	1	1	?	?	1	?	?	?	?	?	?	1	?	?	?	1	3	?	1	Lyrarapax_unguispinus	1	?	-	0	-	1	0	0	0	1	0	0	0	1	0	1	1
Peytoia_nathorsti	1.15	?	?	?	?	1.78-3.35	2.76	0.79-0.80	?	?	?	Peytoia_nathorsti	?	1	?	?	1	?	?	?	?	?	?	1	12	?	?	1	?	?	?	Peytoia_nathorsti	1	?	-	1	0	1	-	-	-	1	0	0	0	1	0	1	1
Isoxys_acutangulus	0.69-0.79	?	?	?	4.62	0.54-1.13	?	?	?	?	?	Isoxys_acutangulus	1	1	?	?	1	13	?	?	?	?	?	1	6	?	?	1	3	?	?	Isoxys_acutangulus	1	?	-	1	?	1	-	-	-	1	1	0	0	0	0	1	1
Nereocaris_briggsi	0.56	?	?	?	?	?	?	?	?	?	?	Nereocaris_briggsi	1	1	?	?	?	40	?	?	?	?	?	?	?	?	?	?	3	?	?	Nereocaris_briggsi	1	?	-	1	1	1	-	-	-	1	1	0	0	0	1	1	1
Fuxianhuia_protensa	0.40-0.60	?	?	?	?	?	?	?	?	?	?	Fuxianhuia_protensa	1	1	?	32	3	?	?	?	?	?	?	?	?	2	3	1	1	13	3	Fuxianhuia_protensa	1	?	-	1	1	1	-	-	-	1	1	0	0	0	0	1	1
Chengjangocaris_kunmingensis	?	?	?	?	?	?	?	?	?	?	?	Chengjangocaris_kunmingensis	1	1	?	26	3	?	?	?	?	?	?	?	?	2	3	1	?	17	3	Chengjangocaris_kunmingensis	1	?	-	1	1	1	-	-	-	1	1	0	0	0	0	1	1
Leanchoilia_superlata	?	?	?	?	?	?	?	?	?	?	?	Leanchoilia_superlata	?	2	?	11	?	?	?	?	?	?	?	?	?	4	5	2	?	7	?	Leanchoilia_superlata	1	?	-	1	1	1	-	-	-	0	-	-	-	-	0	1	1
Alalcomenaeus_cambriensis	?	?	?	?	?	?	?	?	?	?	?	Alalcomenaeus_cambriensis	?	2	?	11	?	?	?	?	?	?	?	?	?	4	5	2	?	7	?	Alalcomenaeus_cambriensis	1	?	-	1	1	1	-	-	-	0	-	-	-	-	0	1	1
YKLP_11075	?	?	?	?	?	?	?	?	?	?	?	YKLP_11075	?	2	?	11	?	?	?	?	?	?	?	?	?	4	?	?	?	?	3	YKLP_11075	1	?	-	1	1	1	-	-	-	0	-	-	-	-	0	1	1
Naraoia_compacta	?	?	?	?	?	?	?	?	?	?	?	Naraoia_compacta	?	?	?	?	2	?	?	?	?	?	?	?	?	4	?	2	?	7	?	Naraoia_compacta	1	?	-	1	1	1	-	-	-	0	-	-	-	-	0	0	-
Olenoides_serratus	?	?	?	?	?	?	?	?	?	?	?	Olenoides_serratus	?	1	?	?	2	?	?	?	?	?	?	?	?	4	?	2	?	7	?	Olenoides_serratus	1	?	-	1	1	1	-	-	-	0	-	-	-	-	0	1	1
[truncated: 81 more columns]

## Sheet: Data
TAXON	SOURCE OF CODING
Caenorhabditis_elegans	[see character descriptions]
Priapulus_caudatus	[see character descriptions]
UB_W266	Müller et al. 1995; Mass & Waloszek, 2001
Stygarctus_bradypus	[see character descriptions]
Actinarctus_doryphorus	[see character descriptions]
Echiniscoides_sigismundi	[see character descriptions]
Echiniscus_testudo	[see character descriptions]
Milnesium_tardigradum	[see character descriptions]
Hypsibius_dujardini	[see character descriptions]
Macrobiotus_hufelandii	[see character descriptions]
Cretoperipatus_burmiticus	Grimaldi et al. 2002; Oliveira et al. 2016
Epiperipatus_edwardsii	[see character descriptions]
Euperipatoides_kanangrensis	[see character descriptions]
Euperipatoides_rowelli	[see character descriptions]
Peripatus_juliformis	[see character descriptions]
Diania_cactiformis	Liu et al. 2011; Ma et al. 2014
Paucipodia_inermis	Chen et al. 1995a; Hou et al. 2004
Microdictyon_sinicum	Chen et al., 1995b
Cardiodictyon_catenulum	Ramsköld & Chen, 1998; Liu & Dunlop, 2014
Hallucigenia_sparsa	Caron et al. 2013; Smith & Caron, 2015; Smith & Ortega-Hernández, 2015
Hallucigenia_fortis	Hou & Bergström, 1995; Ramsköld & Chen, 1998; Ma et al. 2012
Hallucigenia_hongmeia	Steiner et al. 2012
Antennacanthopodia_gracilis	Ou et al. 2011
Aysheaia_pedunculata	Whittington, 1978; Ou et al. 2012; Smith & Ortega-Hernández, 2015
Onychodictyon_ferox	Ramsköld & Chen, 1998; Ou et al. 2012; Topper et al. 2013
Onychodictyon_gracilis	Liu er al. 2008; Ou et al. 2012; Liu & Dunlop, 2014
ROM_52703	ROM 52703; Collins, 1986
ROM_53234	ROM 53234
Ovatiovermis_cribratus	Caron & Aria, 2017
SAM_P14848	García-Bellido et al. 2013
Collinsium_cilliosum	Yang et al. 2015
Acinocrinus_stichus	Conway Morris & Robison, 1988; Ramsköld & Chen, 1998; Yang et al. 2015
Luolishania_longicruris	Ma et al. 2009, 2012
Siberion_lenaicus	Dzik, 2011
Xenusion_auerswaldae	Dzik & Krumbiegel, 1989; Ramsköld & Chen, 1998; Liu & Dunlop, 2014
Hadranax_augustus	Budd & Peel, 1998
Megadictyon_haikouensis	Liu et al. 2006, 2007; Vannier et al. 2014
OUMNH	OUMNH
Pambdelurion_whittingtoni	Budd, 1997; Young & Vinther, 2016; Vinther et al. 2016.
Kerygmachela_kieregaardi	Budd, 1999
Opabinia_regalis	Whittington, 1975; Budd, 1996; Budd & Daley, 2012
Aegirocassis_benmoulae	Van Roy et al. 2015
Anomalocaris_canadensis	Daley & Edgecombe, 2014
Hurdia_victoria	Daley et al. 2013
Lyrarapax_unguispinus	Cong et al. 2014
Peytoia_nathorsti	Collins, 1996; Daley et al. 2013; Van Roy et al. 2015
Isoxys_acutangulus	García-Bellido et al. 2009; Legg & Vannier, 2013
Nereocaris_briggsi	Legg & Caron, 2014
Fuxianhuia_protensa	Hou & Bergström, 1997; Bergström et al. 2008; Ma et al. 2012, 2013, 2015
Chengjangocaris_kunmingensis	Yang et al. 2013, 2016
Leanchoilia_superlata	García-Bellido & Collins, 2007; Haug et al. 2012
Alalcomenaeus_cambriensis	Briggs & Collins, 1999
Alalcomenaeus_sp	Tanaka et al. 2013
Naraoia_compacta	Whittington, 1977; Zhang et al. 2007
Olenoides_serratus	Whittington, 1980
